# Supplementary material
Source: PubMed Central journal article supplement (PMC10326594)
Supplement: ajcr0013-2439-f7.pdf [file ajcr0013-2439-f7.pdf]

## Combined MSC/CD and $\alpha$ -GalCer therapy in colon cancer

**Supplementary Table 1.** Change in WBCs after MSC/CD with 5-FU and  $\alpha$ -GalCer treatment

|             | Normal Mice      | PBS                | $\alpha$ -GalCer   | MSC/CD              | MSC/CD+ $\alpha$ -GalCer |
|-------------|------------------|--------------------|--------------------|---------------------|--------------------------|
| Lymphocytes | 58.93 $\pm$ 5.71 | 23.87 $\pm$ 20.75* | 30.27 $\pm$ 6.73** | 36.97 $\pm$ 2.80**  | 53.17 $\pm$ 8.54         |
| Neutrophils | 27.63 $\pm$ 2.34 | 79.10 $\pm$ 42.03  | 47.73 $\pm$ 3.59** | 52.50 $\pm$ 0.75*** | 20.70 $\pm$ 1.04**       |
| Eosinophils | 0.10 $\pm$ 0.10  | 0.07 $\pm$ 0.06    | 0.07 $\pm$ 0.12    | 0.10 $\pm$ 0.10     | 0.13 $\pm$ 0.23          |
| Basophils   | 5.40 $\pm$ 2.69  | 11.37 $\pm$ 16.74  | 4.83 $\pm$ 5.12    | 1.40 $\pm$ 0.75     | 4.20 $\pm$ 2.79          |
| Monocytes   | 2.77 $\pm$ 1.08  | 3.70 $\pm$ 3.27    | 13.37 $\pm$ 3.76** | 6.07 $\pm$ 0.40**   | 15.53 $\pm$ 3.04**       |

Blood was collected on Day 12. WBC analysis was performed using ADVIA 2021i. Results are expressed as Mean  $\pm$  S.D. Statistical analysis was performed by t-test based on the normal mouse group. *P*-value: \* <0.05, \*\* <0.01, \*\*\* <0.001.

**Supplementary Table 2.** Immune cell markers

| Marker                                                 | Cell type            |
|--------------------------------------------------------|----------------------|
| CD3 <sup>+</sup> CD4 <sup>+</sup>                      | T <sub>H</sub> cells |
| CD3 <sup>+</sup> CD8 <sup>+</sup>                      | T <sub>C</sub> cells |
| CD3 <sup>+</sup> NK1.1 <sup>+</sup>                    | NK cells             |
| CD3 <sup>+</sup> NK1.1 <sup>+</sup>                    | NKT cells            |
| CD3 <sup>+</sup> CD4 <sup>+</sup> CD25 <sup>+</sup>    | Tregs                |
| CD11b <sup>+</sup> GR-1 <sup>+</sup>                   | MDSCs                |
| CD3 <sup>+</sup> CD19 <sup>+</sup>                     | B cells              |
| CD3 <sup>+</sup> CD11c <sup>+</sup> CD64 <sup>+</sup>  | Macrophages          |
| CD3 <sup>+</sup> CD11c <sup>+</sup> MHCII <sup>+</sup> | Dendritic cells      |

**Supplementary Table 3.** Antibodies used in experiments

|                                           | Clone        | Conjugate/<br>Excitation | Tested dilution<br>( $\mu$ g/test) | Supplier   | Cat No.    |
|-------------------------------------------|--------------|--------------------------|------------------------------------|------------|------------|
| anti-CD3                                  | 17A2         | FITC                     | 0.25                               | invitrogen | 11-0032-82 |
| anti-CD4                                  | GK1.5        | PE-Cyanine7              | 0.25                               | invitrogen | 25-0041-82 |
| anti-CD8a                                 | 53-6.7       | APC-eFluor 780           | 0.5                                | invitrogen | 47-0081-82 |
| anti-CD19                                 | eBio1D3(1D3) | PE-Cyanine7              | 0.25                               | invitrogen | 25-0193-82 |
| anti-CD25                                 | PC61.5       | APC                      | 0.125                              | invitrogen | 17-0251-82 |
| anti-NK1.1                                | PK136        | PE                       | 0.25                               | invitrogen | 12-5941-82 |
| anti-Ly-6G/Ly-6C                          | RB6-8C5      | PerCPCyanine5.5          | 0.06                               | invitrogen | 45-5931-80 |
| anti-CD11b                                | M1/70        | AlexaFluor 700           | 0.25                               | invitrogen | 56-0112-82 |
| anti-CD11c                                | N418         | APC-eFluor 780           | 0.5                                | invitrogen | 47-0114-82 |
| anti-CD64                                 | X54-5/7.1    | PE                       | 0.5                                | invitrogen | 12-0641-82 |
| anti-MHCII (I-A/I-E)                      | M5/114.15.2  | APC                      | 0.03                               | invitrogen | 17-5321-82 |
| anti-CD16/CD32                            | 93           | -                        | 0.5                                | invitrogen | 14-0161-86 |
| SYTOX AADvanced Dead cell stain kit       |              | 488 nm excitation        | -                                  | invitrogen | S10349     |
| Live/Dead Fixable Red Dead cell stain kit | -            | 488 nm excitation        | -                                  | invitrogen | L34972     |

Combined MSC/CD and  $\alpha$ -GalCer therapy in colon cancer

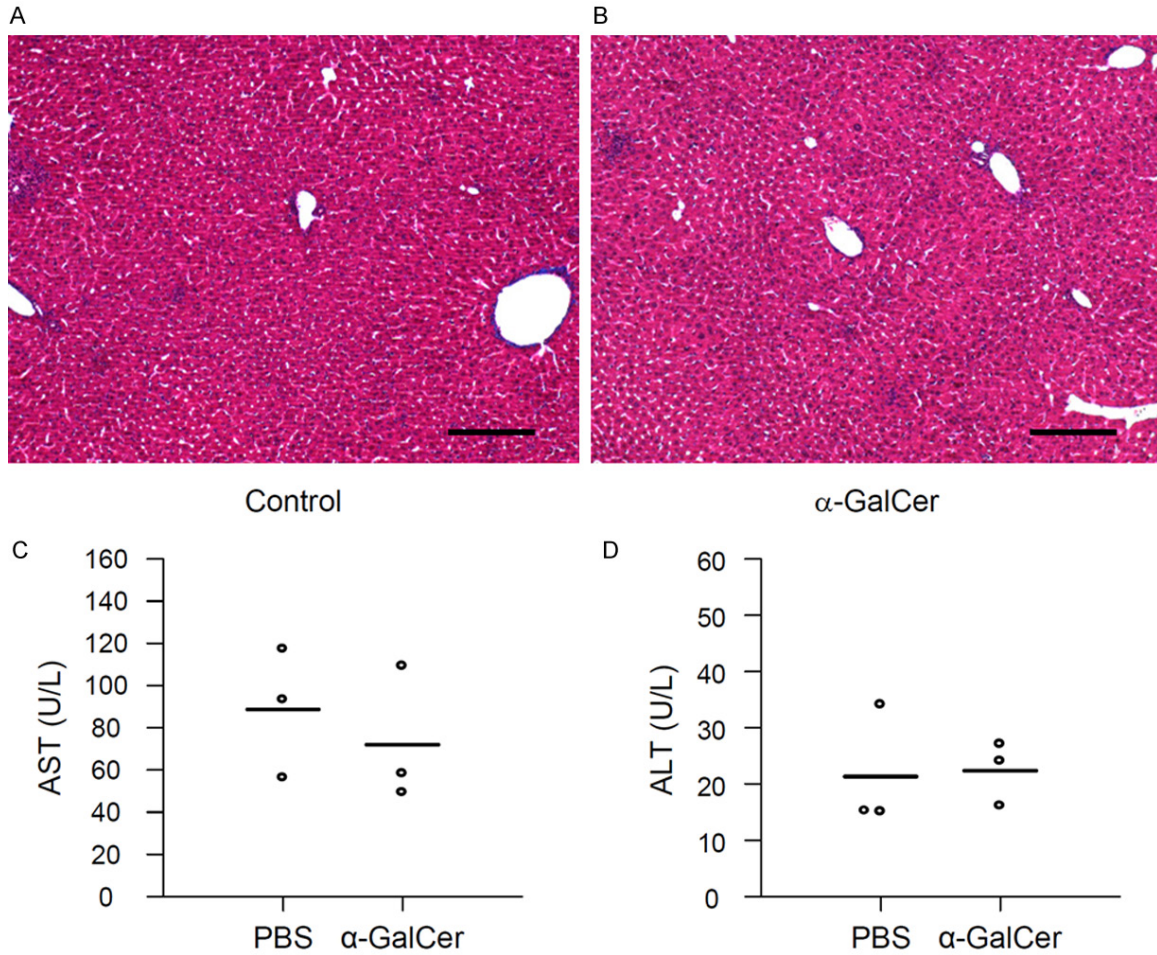

**Supplementary Figure 1.** Hepatotoxicity following intratumoral injection of  $\alpha$ -GalCer. Toxicity assessment after  $\alpha$ -GalCer administration: CT26 ( $2 \times 10^6$  cells, 20% Matrigel,  $n = 3$ ) was inoculated into the left flank of BALB/c mice. Following tumor formation, 120  $\mu$ g/kg  $\alpha$ -GalCer was injected, and analysis was performed 3 days later. A, B. Livers were removed and subjected to Masson's trichrome staining. C, D. AST and ALT levels were measured in serum using a Cobas 8000 c702 instrument from Roche (Tokyo, Japan).

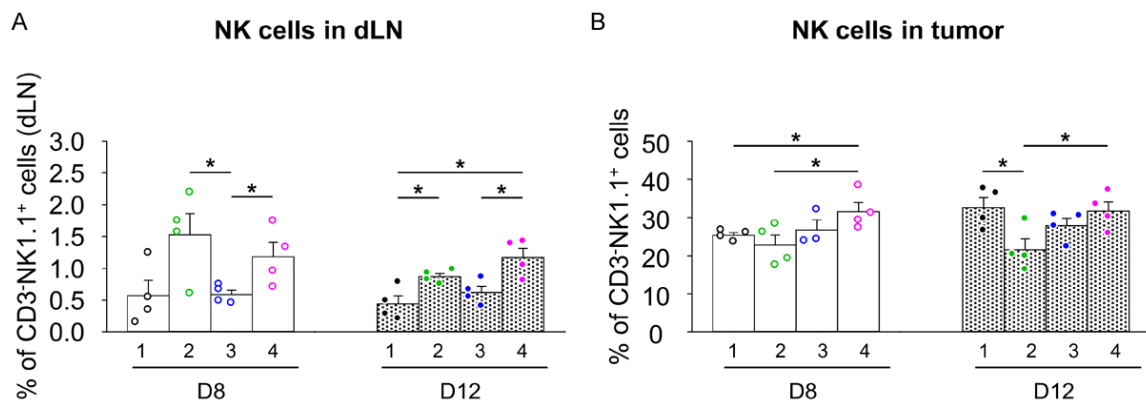

**Supplementary Figure 2.** Effect on NK cells after combined treatment with MSC/CD containing 5-Fc and  $\alpha$ -GalCer in CT26 colorectal cancer model. Experiments were conducted according to Figure 3A. NK cells in each tissue were analyzed by FACS by gating for CD3<sup>+</sup>NK1.1<sup>+</sup>. (A) NK cell ratio in dLN, (B) in tumors.  $n = 3-4$ . \* $P < 0.05$ .

## Combined MSC/CD and $\alpha$ -GalCer therapy in colon cancer

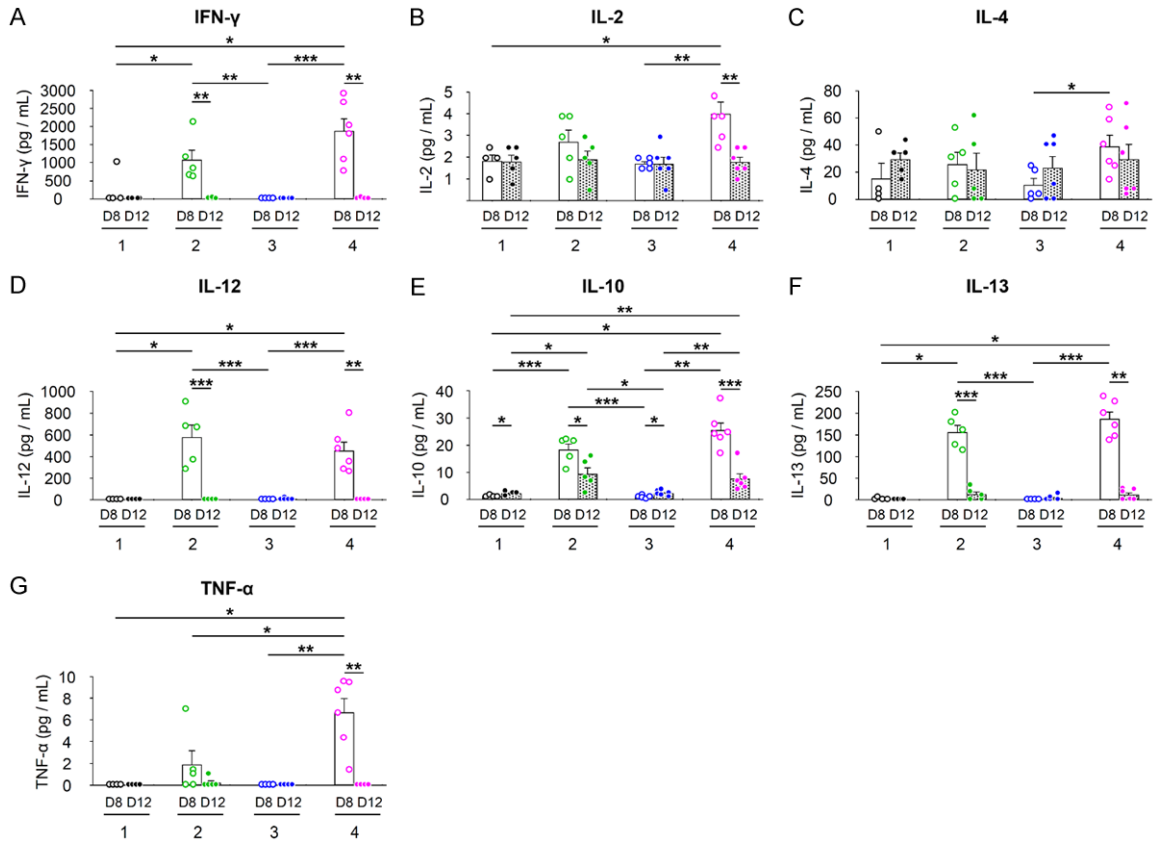

**Supplementary Figure 3.** Cytokine levels in serum after combined treatment of MSC/CD with 5-FU and  $\alpha$ -GalCer in CT26 colon cancer model. Experiments were conducted according to **Figure 3A**; blood was collected, serum was separated, and cytokine levels were measured. (A) IFN- $\gamma$ , (B) IL-2, (C) IL-4, (D) IL-12, (E) IL-10, (F) IL-13, (G) TNF- $\alpha$ . \* $P$ <0.05, \*\* $P$ <0.01, \*\*\* $P$ <0.001.

Combined MSC/CD and  $\alpha$ -GalCer therapy in colon cancer

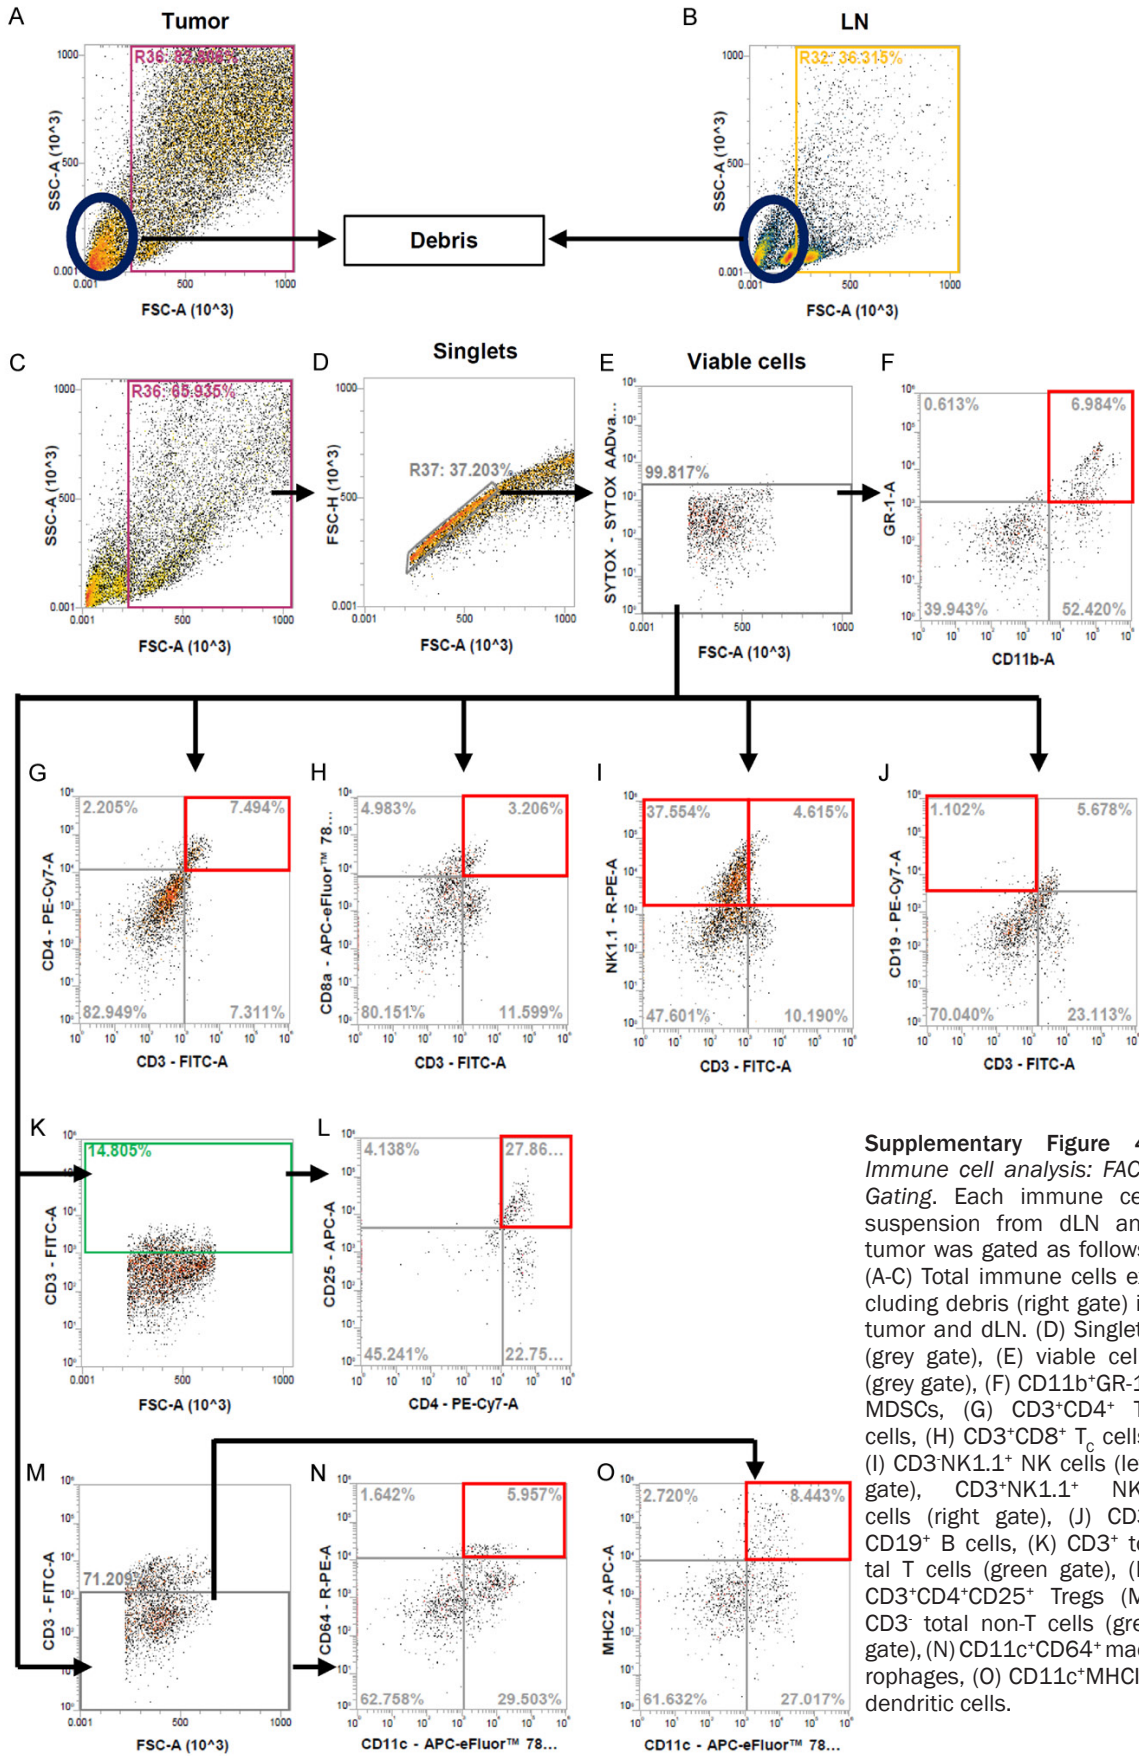

**Supplementary Figure 4.** Immune cell analysis: FACS Gating. Each immune cell suspension from dLN and tumor was gated as follows. (A-C) Total immune cells excluding debris (right gate) in tumor and dLN. (D) Singlets (grey gate), (E) viable cells (grey gate), (F) CD11b<sup>+</sup>GR-1<sup>+</sup> MDSCs, (G) CD3<sup>+</sup>CD4<sup>+</sup> T<sub>H</sub> cells, (H) CD3<sup>+</sup>CD8<sup>+</sup> T<sub>C</sub> cells, (I) CD3<sup>+</sup>NK1.1<sup>+</sup> NK cells (left gate), CD3<sup>+</sup>NK1.1<sup>+</sup> NKT cells (right gate), (J) CD3<sup>+</sup>CD19<sup>+</sup> B cells, (K) CD3<sup>+</sup> total T cells (green gate), (L) CD3<sup>+</sup>CD4<sup>+</sup>CD25<sup>+</sup> Tregs (M) CD3<sup>+</sup> total non-T cells (grey gate), (N) CD11c<sup>+</sup>CD64<sup>+</sup> macrophages, (O) CD11c<sup>+</sup>MHCII<sup>+</sup> dendritic cells.
